# Supplementary material
Source: Springer Nature journal article supplement (https://www.springermedizin.de/resource/supplementary/12885_2013_4153_MOESM1_ESM.pdf/9465582)
Supplement: MOESM1 [file 9465582]

| <b>Gene</b> | <b>Sequence (5'-3')</b>                                  | <b>UCSC position (GRCh37/hg19)</b> | <b>Product size (bp)</b> | <b>Method</b> |
|-------------|----------------------------------------------------------|------------------------------------|--------------------------|---------------|
| PHD1        | F: TATGCCACCAGGTACGCCATC<br>R: AGGAGCAGCCAGCACAGG        | chr19: 41 313 169-41 313 844       | 210                      | RT-PCR        |
| PHD2        | F: GGACGACCTGATACG<br>R: ACTTACCTTGGCATCC                | chr1: 231 506424-231 556 792       | 190                      | RT-PCR        |
| PHD3        | F: CCTCTTACGCAACCAGATATG<br>R: AGCACGGTCAGTCTTCAG        | chr14: 34 395 090-34 398 297       | 129                      | RT-PCR        |
| FIH         | F: ACAGTGCCAGCACCCACAA<br>R: GCCCACAGTGTCATTGAGCG        | chr10:102 296 208-102 300 427      | 188                      | RT-PCR        |
| PBDG        | F: GCCAAGGACCAGGACATC<br>R: TCAGGTACAGTTGCCCATC          | chr11:118 468 348-118 468 864      | 160                      | RT-PCR        |
| hMRPL19     | F: ACTTTATAATCCTCGGGTC<br>R: ACTTTCAGCTCATTAACAG         | chr2:75 735 389- 75 735 705        | 171                      | RT-PCR        |
| PHD1S       | F: TATGAATTTTGTGTGTGTTTTGA<br>R: TATGAATTTTGTGTGTGTTTTGA | chr19: 41 304 043-41 304 698       | 656                      | BS            |
| PHD2S1      | F: TGGAGGAAGAGTAGTTATG<br>R: ATAACAACCTAAACTCAAAC        | chr1: 231 557 896-231 558 421      | 526                      | BS            |
| PHD2S2      | F: GTTTGAGTTTAGGTTGTTATT<br>R: AATACTAATATAAACCCACTC     | chr1:231 557 412-231 557 915       | 504                      | BS            |
| PHD3S1      | F: AGTGTGGGATTTAGGTTTTTAAGT                              | chr14:34 419 929-34 420 563        | 635                      | BS            |

|        |                                                                    |                                 |     |      |
|--------|--------------------------------------------------------------------|---------------------------------|-----|------|
|        | R: ATCCAACCTCATAATATATCCCA                                         |                                 |     |      |
| PHD3S2 | F: ATTATGAGGTTGGATTTGGAGA<br>R: ATCACCCACAAAAACCAATATT             | chr14: 34 419 346-34 419 943    | 598 | BS   |
| FIHS1  | F: TGAATTTGTTTTTTTTTTTGA<br>R: ACCAAAAACCACAACCTC                  | chr10: 102 295 385-102 299 751  | 367 | BS   |
| PHD1.1 | F: GTGTGGTTATGAATTTTGTGTG<br>R: CTACACCAATCCCCTACAAAC              | chr19: 41 304 036-41 304 177    | 142 | HRMA |
| PHD1.2 | F: CGGGTAGGTTTGTTTATGTAAA<br>R: ACACGAAATTCATTTACATCCT             | chr19: 41 304 758-41 304 922    | 165 | HRMA |
| PHD2.1 | F: GGGAGTTTGATTTTTGGATTTAGT<br>R: AATCATAACTACTCTTCCTCCAAACC       | chr1: 231 558 400 – 231 558 576 | 177 | HRMA |
| PHD2.2 | F: TTAGCGTTAGGATTGGAAGAAG<br>R: ACCTTCCTAAACTCCCGAAC               | chr1: 231 557 348- 231 557 497  | 150 | HRMA |
| PHD2.3 | F:GGGGTTCGGGAGTTTAGGAAGGTAG<br>R: CCGAAAACCTTAACCTTTACTTTTCCCTTAAC | chr1:231 557 283-231 557 370    | 88  | HRMA |
| PHD3.1 | F: CGTGGTAGTCGTAGGTTTTTG<br>R: TCTCCAAATCCAACCTCATAAT              | chr14: 34 419 922-34 420 080    | 159 | HRMA |
| PHD3.2 | F: GTTGGATTTGGAGAAAATTG<br>R: ACCCCGATACAATACAACTAC                | chr14: 34 419 795-34 419 935    | 141 | HRMA |
| PHD3.3 | F: TTGTATGTCGATTTTTTAGGGT<br>R: ACCTAAACCCCTTAACGTTAAC             | chr14: 34 419 400 -34 419 538   | 139 | HRMA |

|       |                                                        |                                 |     |      |
|-------|--------------------------------------------------------|---------------------------------|-----|------|
| FIH.1 | F: TTGGGTGTGTGGTTTTTTTG<br>R: CGAAACTCTCCAAAACCAAAAACC | chr10: 102 295 626- 102 295 765 | 140 | HRMA |
|-------|--------------------------------------------------------|---------------------------------|-----|------|

**Additional file 1. Primer sequences**

**RT-PCR-** real-time quantitative polymerase chain reaction

**BS-** bisulfite sequencing

**HRMA-** high resolution melting analysis

Primer localization for BS and HRMA was presented in Additional file 2.
